# Supplementary material for: Heavy Metal Pollution in Sediments of the Yu River in a Polymetallic Ore Concentration Area: Temporal–Spatial Variation, Risk Assessment, and Sources Apportionment
Source: MDPI journal article supplement (doi:10.3390/su16031154), 2024-01-30
Supplement: s1 [file s1]

Table S1 Total variance of explained and rotated component matrix for total concentrations of heavy metals in sediment of Yu River

| Component | Initial Eigenvalues |               |              | Rotation Sums of Squared Loadings |               |              |
|-----------|---------------------|---------------|--------------|-----------------------------------|---------------|--------------|
|           | Total               | % of Variance | Cumulative % | Total                             | % of Variance | Cumulative % |
| Aug.      | 1                   | 4.31          | 47.93        | 3.03                              | 33.62         | 33.62        |
|           | 2                   | 1.30          | 14.49        | 2.41                              | 26.74         | 60.36        |
|           | 3                   | 1.03          | 11.40        | 1.08                              | 12.04         | 72.40        |
|           | 4                   | 0.89          | 9.85         | 1.01                              | 11.27         | 83.67        |
|           | 5                   | 0.65          | 7.21         |                                   |               |              |
|           | 6                   | 0.40          | 4.42         |                                   |               |              |
|           | 7                   | 0.32          | 3.60         |                                   |               |              |
|           | 8                   | 0.08          | 0.93         |                                   |               |              |
|           | 9                   | 0.02          | 0.17         |                                   |               |              |
| Dec.      | 1                   | 4.24          | 47.15        | 3.59                              | 39.92         | 39.92        |
|           | 2                   | 1.35          | 14.96        | 1.56                              | 17.30         | 57.21        |
|           | 3                   | 1.33          | 14.74        | 1.50                              | 16.65         | 73.87        |
|           | 4                   | 0.85          | 9.48         | 1.12                              | 12.47         | 86.34        |
|           | 5                   | 0.58          | 6.40         |                                   |               |              |
|           | 6                   | 0.38          | 4.18         |                                   |               |              |
|           | 7                   | 0.14          | 1.59         |                                   |               |              |
|           | 8                   | 0.10          | 1.14         |                                   |               |              |
|           | 9                   | 0.03          | 0.36         |                                   |               |              |
| Apr.      | 1                   | 3.89          | 43.17        | 3.02                              | 33.54         | 33.54        |
|           | 2                   | 1.31          | 14.60        | 1.86                              | 20.68         | 54.23        |
|           | 3                   | 1.12          | 12.48        | 1.37                              | 15.20         | 69.42        |
|           | 4                   | 1.02          | 11.28        | 1.09                              | 12.10         | 81.53        |
|           | 5                   | 0.61          | 6.82         |                                   |               |              |
|           | 6                   | 0.51          | 5.68         |                                   |               |              |
|           | 7                   | 0.33          | 3.69         |                                   |               |              |
|           | 8                   | 0.14          | 1.56         |                                   |               |              |
|           | 9                   | 0.07          | 0.72         |                                   |               |              |
